# Supplementary material for: Hydration lubrication and shear-induced self-healing of lipid bilayer boundary lubricants in phosphatidylcholine dispersions
Source: Royal Society of Chemistry journal article supplement (doi:10.1039/c5sm02475g), 2016-01-01
Supplement: c5sm02475g1.pdf [file c5sm02475g1.pdf]

## Hydration lubrication and shear-induced self-healing of lipid bilayer boundary lubricants in phosphatidylcholine dispersions.

Raya Sorkin<sup>1</sup>, Nir Kampf<sup>1</sup>, Linyi Zhu<sup>1,2</sup> and Jacob Klein<sup>1</sup>

1. Weizmann Institute of Science, Materials and interfaces department, Rehovot, Israel

2. Key Laboratory of Colloid and Interface Science, Beijing National Laboratory for Molecular Sciences (BNLMS), Institute of Chemistry, Chinese Academy of Sciences, Beijing 100190, P.R. China

### Supplementary Data

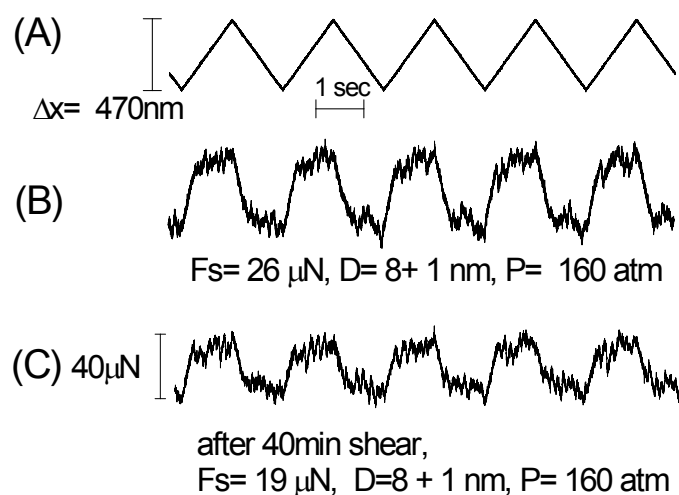

Figure S1: Typical shear force versus time traces for the DPPC-SUV system taken directly from the SFB for one contact position. Trace (a) shows the applied back and forth lateral motion of the upper surface  $\Delta x_0$ . Trace (b) shows the response motion at the indicated compression, while trace (c) shows the response motion at the same compression after applying continuous shear motion for 40 minutes. Corresponding friction forces  $F_s$  are also shown. The shear force after forty minutes is substantially lower.
